# Supplementary material
Source: publisher figshare collection journal article supplement (https://acs.figshare.com/ndownloader/files/3718408)
Supplement: Supplementary file 1 [file 3718408]

## **Supporting information**

### **Facilely Fabricating Multifunctional N-enriched Carbon**

**Mi Mi Wan<sup>a</sup>, Xiao Dan Sun<sup>a</sup>, Yan Yan Li<sup>a</sup>, Jun Zhou<sup>b</sup>, Ying Wang<sup>\*b</sup>,  
Jian Hua Zhu<sup>\*a</sup>**

<sup>a</sup> Key Laboratory of Mesoscopic Chemistry of MOE, College of Chemistry and Chemical Engineering, Nanjing University, Nanjing 210093, China; E-mail: jhzhzhu@nju.edu.cn

<sup>b</sup> College of Chemistry & Chemical Engineering, Nanjing University, Nanjing 210093, China.

**Table S1.** Zn content of the PCn samples detected by ICP.

| Samples          | PC600 | PC700 | PC800 | PC900 | PC1000 | PC900 (washed 4 h) |
|------------------|-------|-------|-------|-------|--------|--------------------|
| Zn content (ppm) | 0     | 0     | 0     | 0     | 0      | 0.0562             |

**Table S2.** Reduction of TSNA in the tobacco extracting solution by porous carbon materials

| Sample  | NNN (%) | NAT (%) | NNK (%) | TSNA (%) |
|---------|---------|---------|---------|----------|
| PC600   | 12.4    | 28.2    | 76.6    | 36.4     |
| PC700   | 15.6    | 24.6    | 51.7    | 29.1     |
| PC800   | 41.0    | 56.2    | 73.8    | 56.4     |
| PC900   | 38.6    | 55.4    | 85.5    | 58.5     |
| PC1000  | 18.8    | 26.4    | 43.6    | 28.7     |
| PC900b  | 40.0    | 46.7    | 84.3    | 54.6     |
| PC900c  | 21.8    | 28.3    | 48.9    | 31.9     |
| PC900d  | 26.4    | 34.4    | 70.4    | 41.5     |
| PC900-1 | 41.4    | 56.7    | 79.9    | 58.4     |
| PC900-3 | 52.8    | 79.9    | 86.2    | 73.7     |
| PC900-5 | 45.0    | 63.5    | 80.9    | 62.7     |

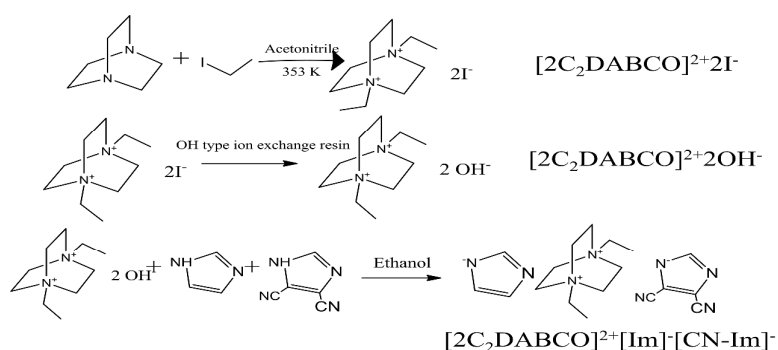**Scheme S1.** Synthetic procedure of dual-Ionic Liquids.

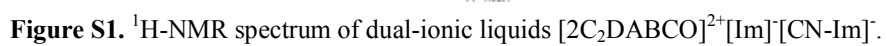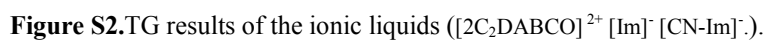

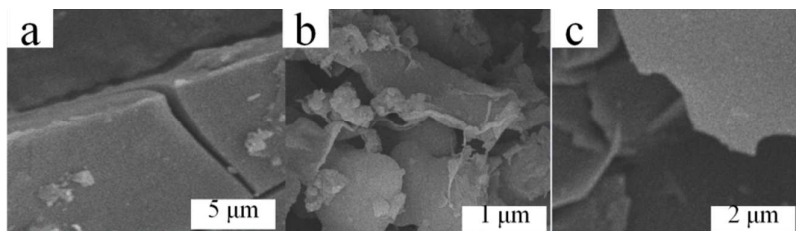

**Figure S3.** SEM images of (a) PC900d, (b) PC900b and (c) PC900c.

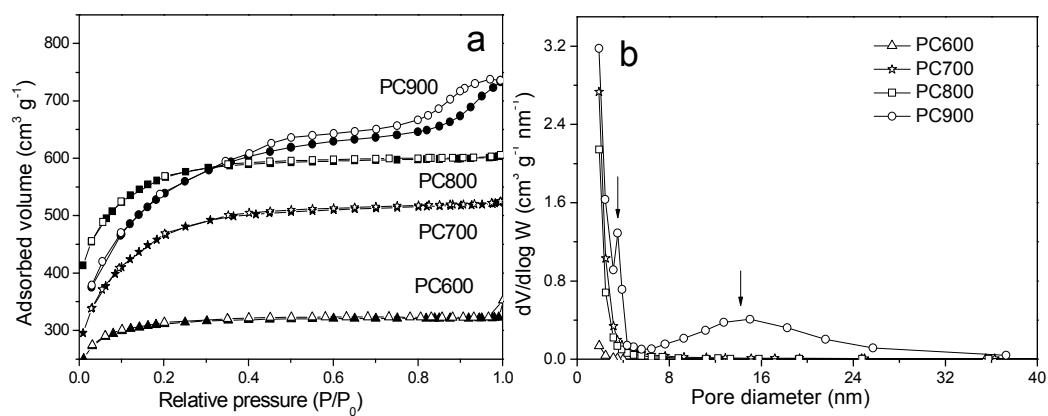

**Figure S4.** The nitrogen adsorption-desorption isotherms (a) and pore size distributions (b) of PCn series samples. The isotherms of PC800 were offset vertically by  $100 \text{ cm}^3 \text{ g}^{-1}$

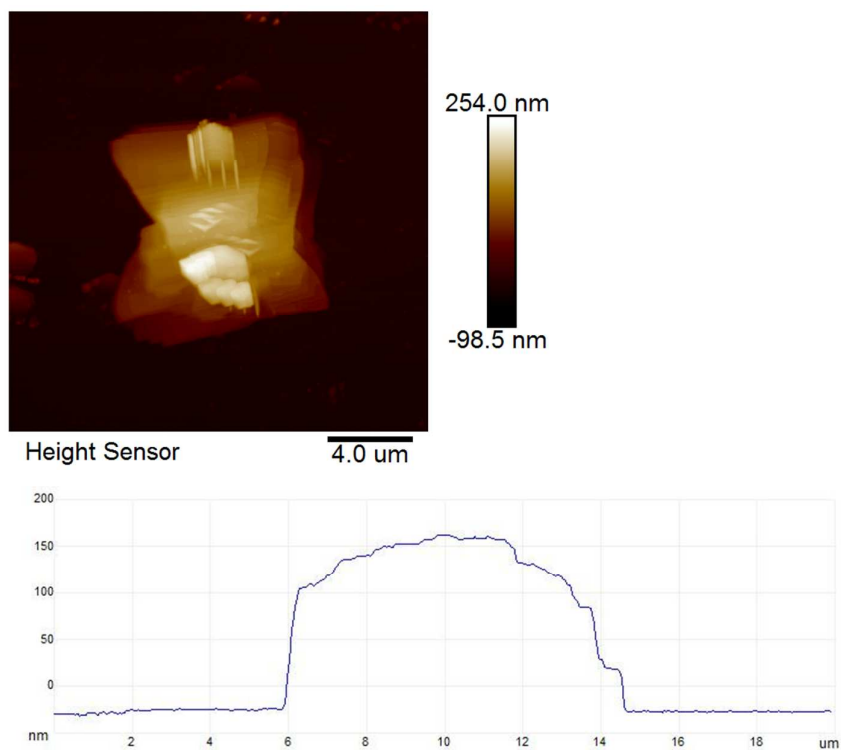

**Figure S5.** TM-AFM images of PC800 sample.

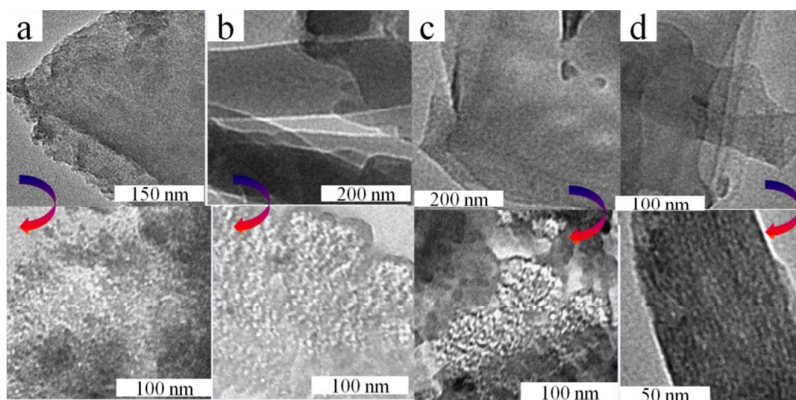

**Figure S6.** TEM images of (a) PC600, (b) PC700, (c) PC800, and (d) PC900.

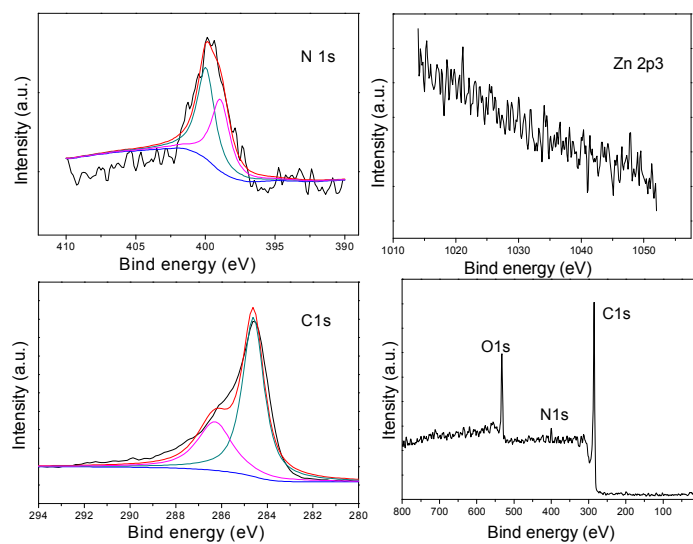

**Figure S7.** XPS profiles of the PC900 sample.

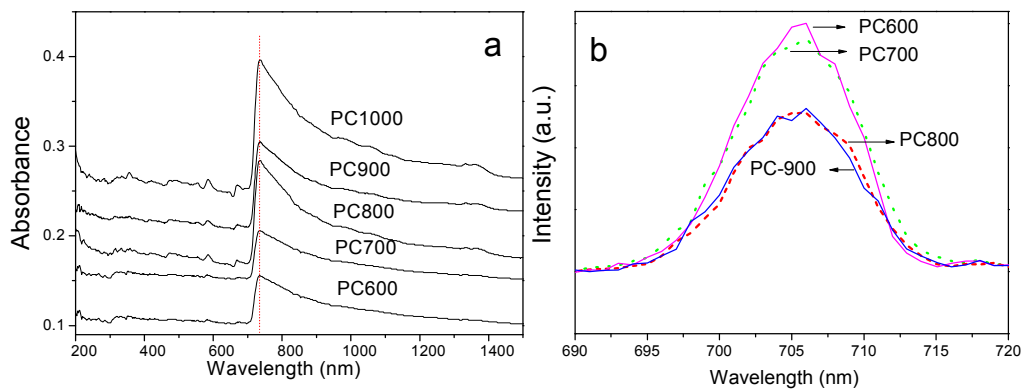

**Figure S8.** UV/Vis absorption spectra (a) and fluorescence spectra of PCn samples under an excitation wavelength of 250 nm (b).

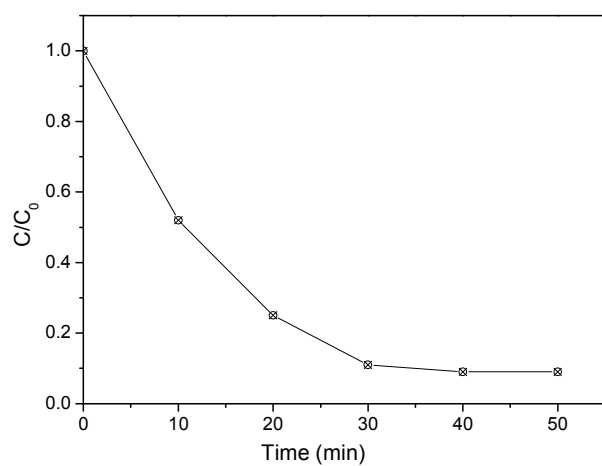

**Figure S9.** Removal of MO in the presence of PC800 under visible light.

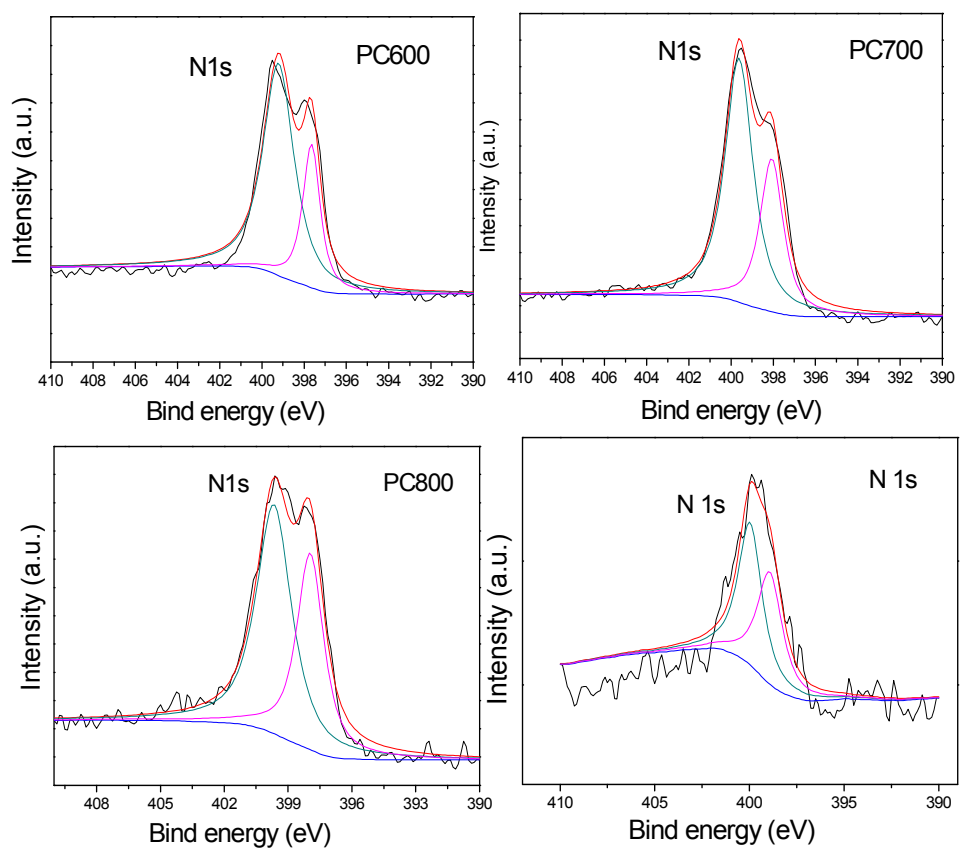

**Figure S10.** XPS profiles of the PCn sample.

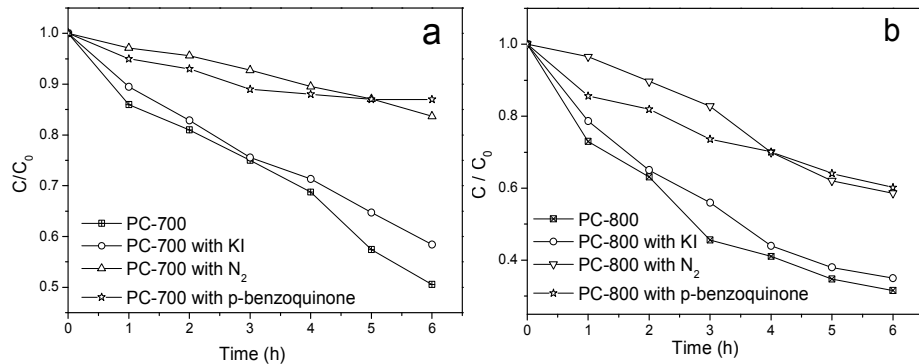

**Figure S11.** The effects of KI and N<sub>2</sub> on the degradation of MO in the presence of PC700 (a) and PC800 (b) under visible light irradiation ( $\lambda > 420$  nm).

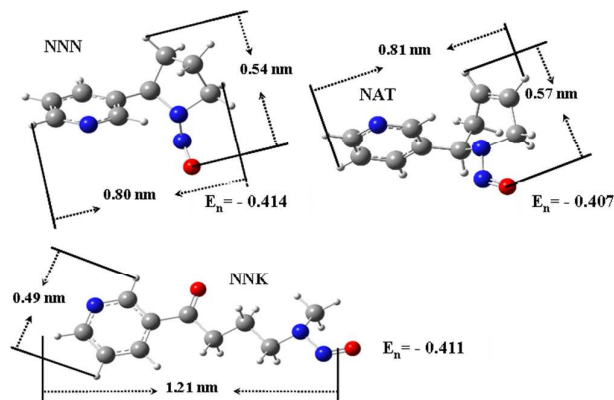

**Figure S12.** Simulation optimized structure of TSNA (NNN, NAT and NNK) molecules.
